# Supplementary material for: Implicit and Explicit Solvent Effects on the Global Reactivity and the Density Topological Parameters of the Preferred Conformers of Caespitate
Source: MDPI journal article supplement (doi:10.3390/computation12010005), 2024-01-03
Supplement: s1 [file s1]

## Supplementary Materials

# Implicit and explicit solvent effect on the global reactivity and the density topological parameters of the preferred conformers of caespitate

Andrea Moreno-Ceballos <sup>1</sup>, María Eugenia Castro <sup>2,\*</sup>, Norma A. Caballero <sup>3</sup>, Liliana Mammino <sup>4</sup>, Francisco J. Melendez <sup>1,\*</sup>

<sup>1</sup> Laboratorio de Química Teórica, Centro de Investigación, Departamento de Fisicoquímica, Facultad de Ciencias Químicas, Benemérita Universidad Autónoma de Puebla, Edif. FCQ10, 22 Sur y San Claudio, Ciudad Universitaria, Col. San Manuel, Puebla 72570, Mexico; andrea.morenoce@alumno.buap.mx

<sup>2</sup> Centro de Química, Instituto de Ciencias, Benemérita Universidad Autónoma de Puebla, Complejo de Ciencias, ICUAP, Edif. IC10, 22 Sur y San Claudio, Ciudad Universitaria, Col. San Manuel, Puebla 72570, Mexico

<sup>3</sup> Facultad de Ciencias Biológicas, Benemérita Universidad Autónoma de Puebla, Edif. BIO1, 22 Sur y San Claudio, Ciudad Universitaria, Col. San Manuel, Puebla 72570, Mexico; norma.caballero@correo.buap.mx

<sup>4</sup> Faculty of Science, Engineering and Agriculture, University of Venda, Thohoyandou 0950, South Africa; sasdestria@yahoo.com

\* Correspondence: mareug.castro@correo.buap.mx (M.E.C.); francisco.melendez@correo.buap.mx (F.J.M.); Tel.: +52-2222295500 (ext. 7739) (M.E.C.); +52-2222295500 (ext. 2830) (F.J.M.)

**Table S1.** Relative free energy ( $\Delta G$ , kcal mol<sup>-1</sup>) and population (%) of conformers of caespitate with free energies  $\leq 2$  kcal mol<sup>-1</sup> calculated at the APFD/6-311+G(2d,p) level of theory in gas and solution phases.

| Conformer         | $\Delta G$ | Population |
|-------------------|------------|------------|
| <b>Gas</b>        |            |            |
| G1                | 0.0000     | 24.60      |
| G2                | 0.0063     | 23.65      |
| G3                | 0.6903     | 19.88      |
| G4                | 0.8063     | 6.73       |
| G5                | 0.8120     | 6.31       |
| G6                | 0.8860     | 5.66       |
| G7                | 1.0084     | 5.60       |
| G8                | 1.1107     | 4.95       |
| G9                | 1.1163     | 4.02       |
| G10               | 1.1370     | 3.38       |
| G11               | 1.2149     | 3.35       |
| G12               | 1.2218     | 3.24       |
| G13               | 1.4502     | 2.84       |
| G14               | 1.4590     | 2.81       |
| G15               | 1.6824     | 1.91       |
| G16               | 1.6880     | 1.88       |
| G17               | 1.7275     | 1.29       |
| G18               | 1.7551     | 1.28       |
| G19               | 1.7583     | 1.20       |
| G20               | 1.9578     | 1.14       |
| G21               | 2.0124     | 1.13       |
| G22               | 2.0626     | 0.81       |
| G23               | 2.0771     | 0.74       |
| G24               | 2.0852     | 0.68       |
| <b>Water</b>      |            |            |
| W1                | 0.0000     | 26.50      |
| W2                | 0.0454     | 17.19      |
| W3                | 0.0554     | 15.18      |
| W4                | 0.2789     | 14.10      |
| W5                | 0.3094     | 10.72      |
| W6                | 0.5990     | 7.08       |
| W7                | 0.6498     | 6.50       |
| W8                | 0.6815     | 6.16       |
| W9                | 1.6346     | 1.23       |
| W10               | 2.0400     | 0.16       |
| <b>Chloroform</b> |            |            |
| C1                | 0.0000     | 49.10      |
| C2                | 0.0211     | 22.76      |
| C3                | 0.3750     | 6.37       |
| C4                | 0.3795     | 5.95       |
| C5                | 0.4444     | 5.58       |
| C6                | 0.4527     | 5.51       |
| C7                | 0.4716     | 5.24       |
| C8                | 0.6693     | 4.71       |
| C9                | 0.7320     | 2.63       |
| C10               | 1.0783     | 1.92       |
| C11               | 1.2632     | 1.58       |
| C12               | 1.3781     | 1.54       |

|              |        |       |
|--------------|--------|-------|
| C13          | 1.3956 | 1.37  |
| C14          | 1.4621 | 1.28  |
| C15          | 1.5048 | 1.25  |
| C16          | 1.5174 | 0.97  |
| C17          | 1.6686 | 0.94  |
| C18          | 1.6880 | 0.72  |
| C19          | 1.8437 | 0.71  |
| C20          | 1.8575 | 0.69  |
| C21          | 1.8688 | 0.68  |
| C22          | 1.8788 | 0.68  |
| C23          | 1.8819 | 0.59  |
| C24          | 1.9585 | 0.48  |
| C25          | 2.0834 | 0.47  |
| C26          | 2.0903 | 0.35  |
| <hr/>        |        |       |
| Acetonitrile |        |       |
| A1           | 0.0000 | 20.25 |
| A2           | 0.0076 | 15.54 |
| A3           | 0.0128 | 14.94 |
| A4           | 0.2904 | 14.34 |
| A5           | 0.3806 | 11.96 |
| A6           | 0.3883 | 5.64  |
| A7           | 0.3966 | 5.56  |
| A8           | 0.4489 | 5.09  |
| A9           | 0.4516 | 5.07  |
| A10          | 0.4620 | 4.98  |
| A11          | 0.5045 | 4.64  |
| A12          | 0.6295 | 3.75  |
| A13          | 0.6562 | 3.59  |
| A14          | 1.1510 | 1.56  |
| A15          | 1.1881 | 1.46  |
| A16          | 1.2583 | 1.30  |
| A17          | 1.3318 | 1.15  |
| A18          | 1.3512 | 1.11  |
| A19          | 1.3650 | 1.09  |
| A20          | 1.3832 | 1.05  |
| A21          | 1.4296 | 0.97  |
| A22          | 1.4359 | 0.96  |
| A23          | 1.5112 | 0.85  |
| A24          | 1.5376 | 0.81  |
| A25          | 1.6850 | 0.63  |
| A26          | 1.6995 | 0.62  |
| A27          | 1.7516 | 0.57  |
| A28          | 1.7603 | 0.56  |
| A29          | 1.7672 | 0.55  |
| A30          | 1.7999 | 0.52  |
| A31          | 1.8156 | 0.51  |
| A32          | 1.8306 | 0.49  |
| A33          | 2.0728 | 0.33  |
| <hr/>        |        |       |
| DMSO         |        |       |
| D1           | 0.0000 | 23.62 |
| D2           | 0.0905 | 21.66 |
| D3           | 0.1074 | 13.10 |
| D4           | 0.3467 | 7.18  |

|     |        |      |
|-----|--------|------|
| D5  | 0.4277 | 7.09 |
| D6  | 0.4340 | 6.20 |
| D7  | 0.4421 | 5.41 |
| D8  | 0.4694 | 5.35 |
| D9  | 0.4857 | 5.28 |
| D10 | 0.5242 | 5.04 |
| D11 | 0.5266 | 4.91 |
| D12 | 0.5410 | 4.60 |
| D13 | 0.5475 | 4.58 |
| D14 | 1.1495 | 4.47 |
| D15 | 1.1564 | 4.42 |
| D16 | 1.1827 | 1.60 |
| D17 | 1.1915 | 1.58 |
| D18 | 1.2411 | 1.51 |
| D19 | 1.2706 | 1.49 |
| D20 | 1.2825 | 1.37 |
| D21 | 1.3038 | 1.30 |
| D22 | 1.4155 | 1.28 |
| D23 | 1.4620 | 1.23 |
| D24 | 1.5002 | 1.02 |
| D25 | 1.5128 | 0.94 |
| D26 | 1.5266 | 0.89 |
| D27 | 1.7795 | 0.87 |
| D28 | 1.7876 | 0.85 |
| D29 | 1.8485 | 0.55 |
| D30 | 1.8560 | 0.54 |
| D31 | 1.8749 | 0.49 |
| D32 | 1.8981 | 0.49 |
| D33 | 1.9150 | 0.47 |
| D34 | 1.9765 | 0.45 |

---

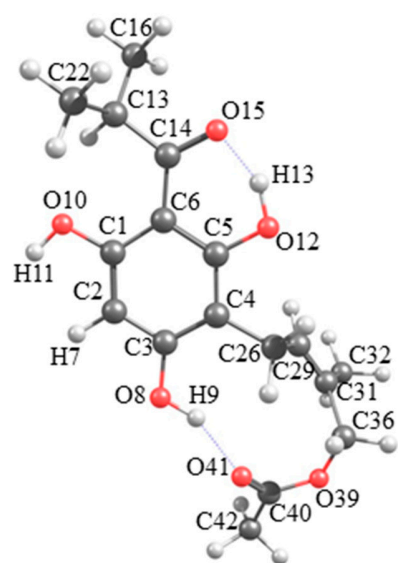

**G1**

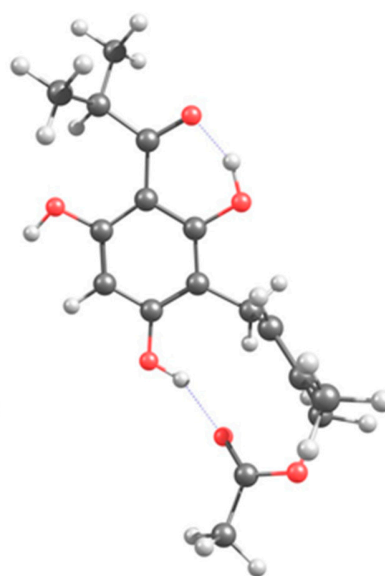

**G2**

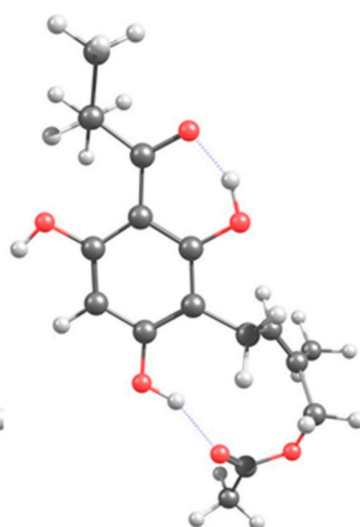

**G3**

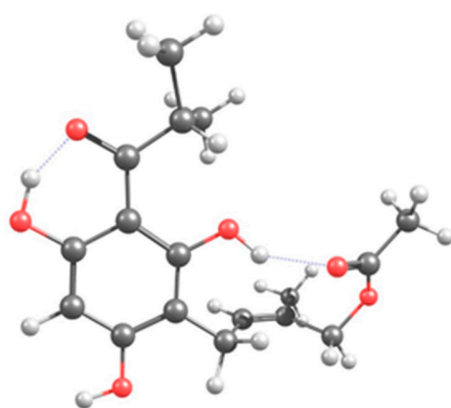

**G4**

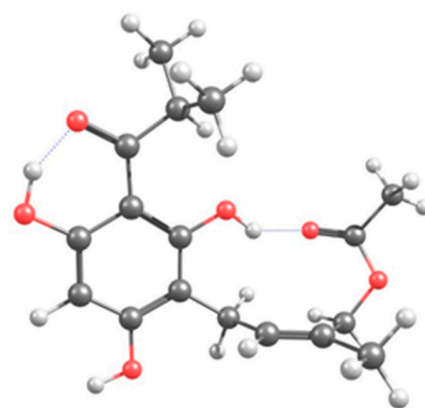

**G5**

**Gas**

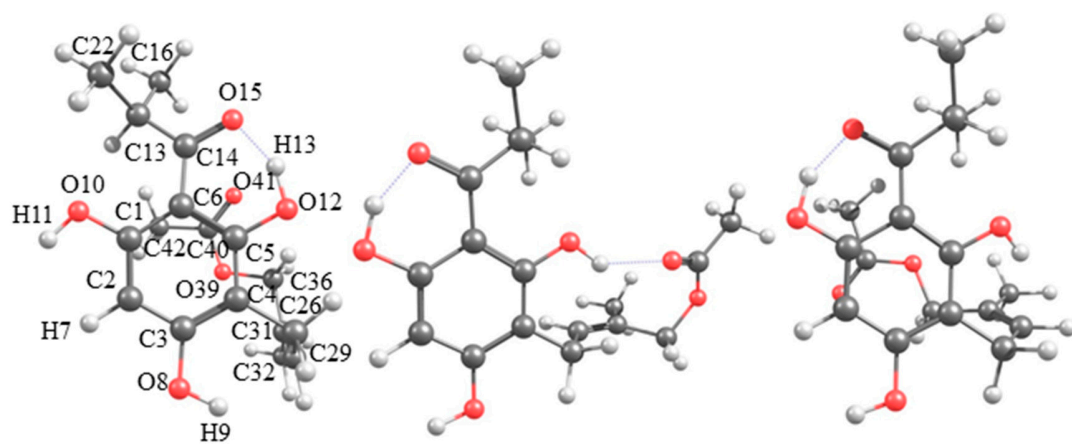

**W1**

**W2**

**W3**

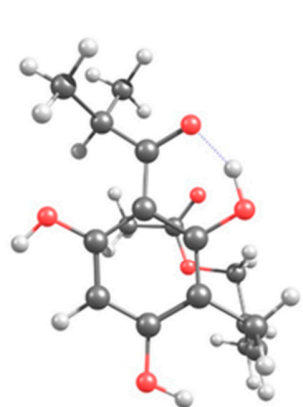

**W4**

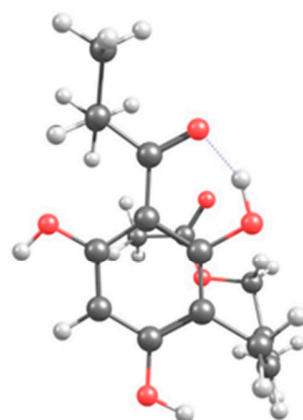

**W5**

**Water**

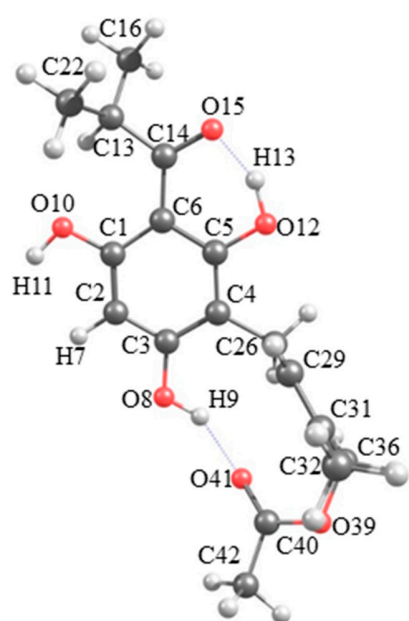

**C1**

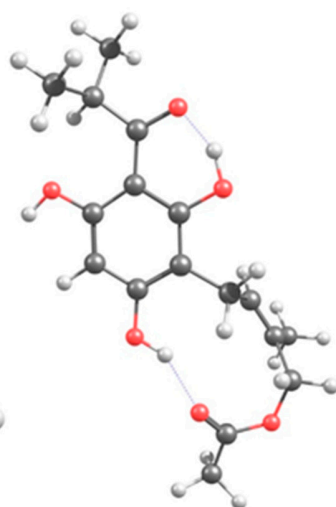

**C2**

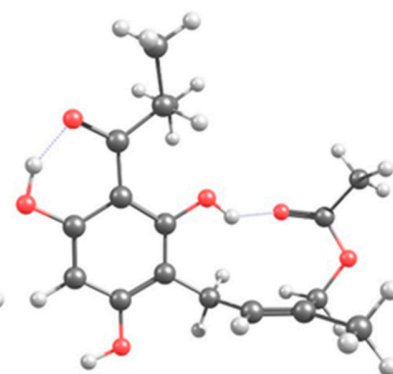

**C3**

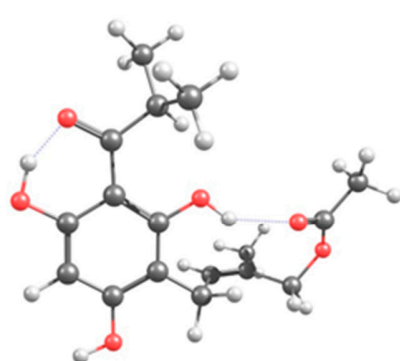

**C4**

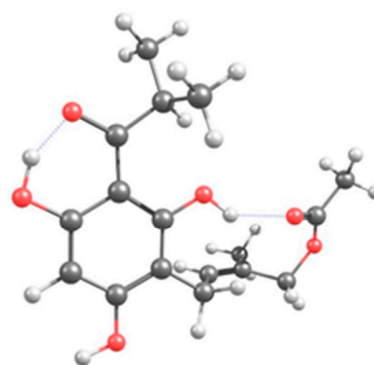

**C5**

**Chloroform**

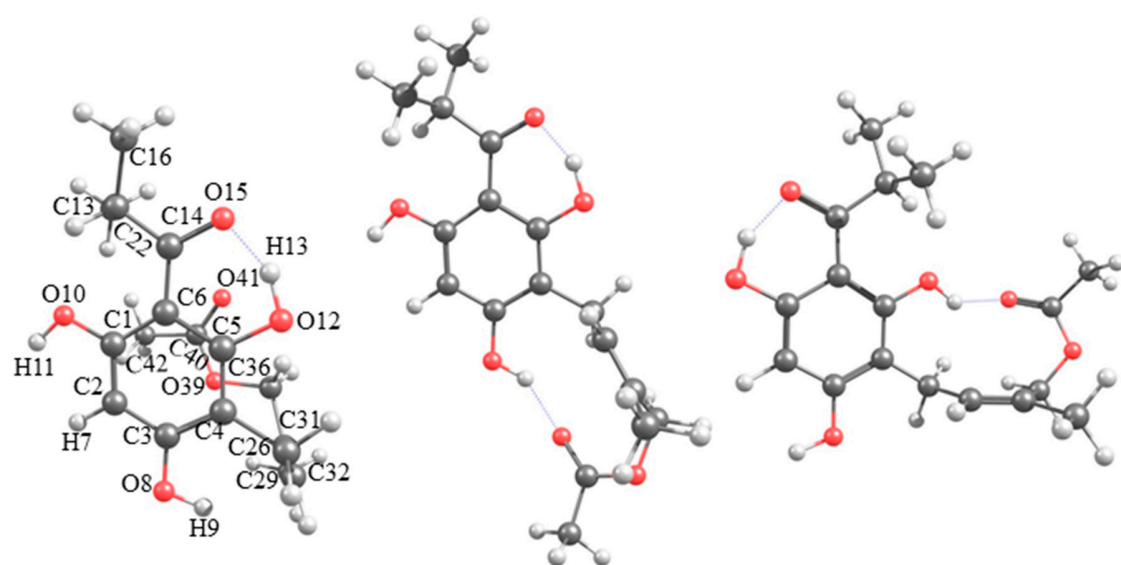

**A1**

**A2**

**A3**

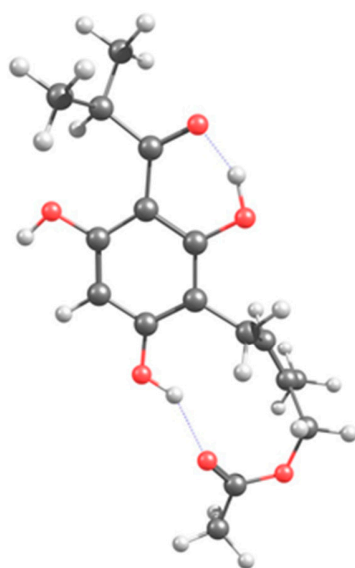

**A4**

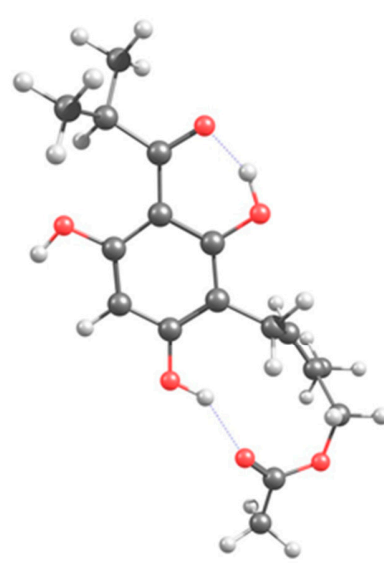

**A5**

**Acetonitrile**



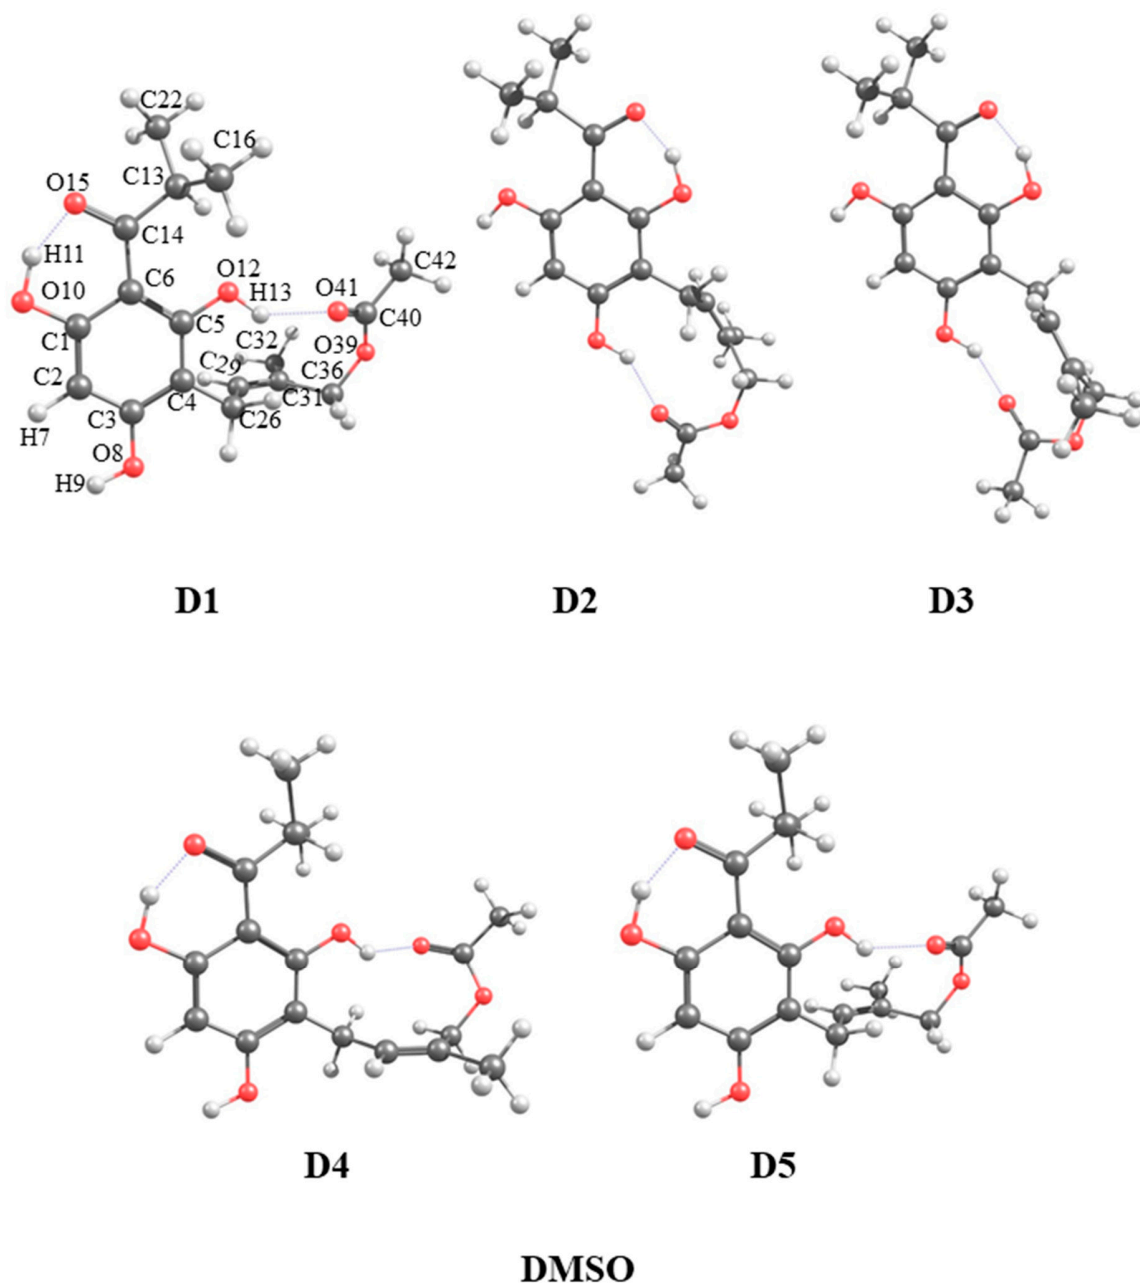

**Figure S1.** Molecular structures of the five most stable conformers of caespitate calculated at the APFD/6-311+G(2d,p) level of theory in gas and solution phases. In gas (**G1-G5**), water (**W1-W5**), chloroform (**C1-C5**), acetonitrile (**A1-A5**), and DMSO (**D1-D5**) phases.

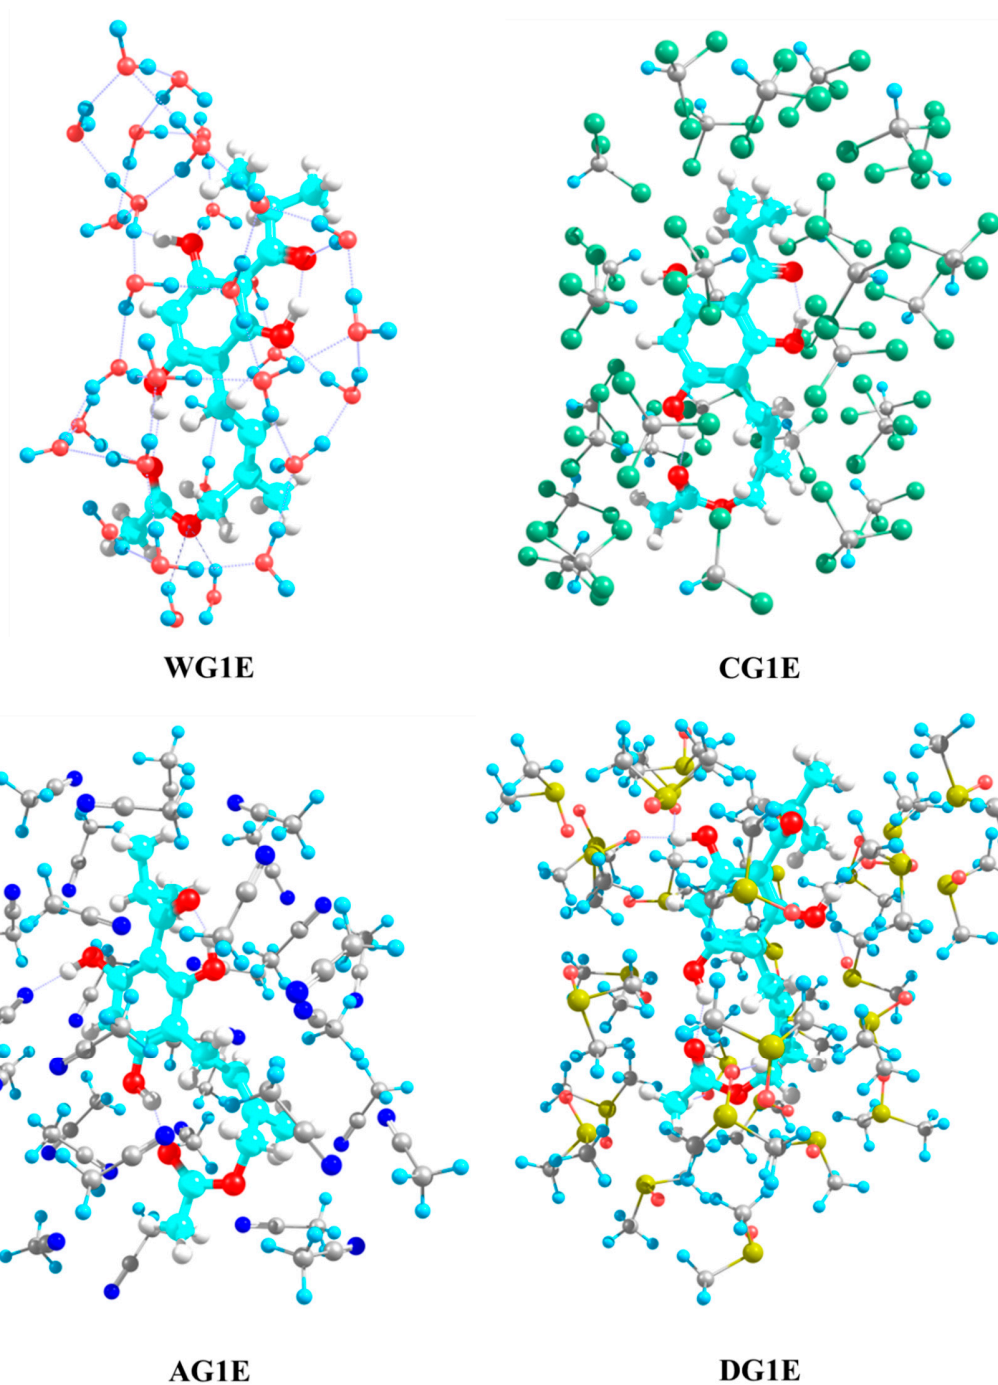

**Figure S2.** Optimized geometries of the caespitate–explicit solvent systems calculated at the ONIOM ( $\omega$ B97X-D3/Def2-TZVP:XTB2) method obtained from the most stable conformer in gas phase (**G1**) surrounded by water (**WG1E**), chloroform (**CG1E**), acetonitrile (**AG1E**), and DMSO (**DG1E**) molecules.

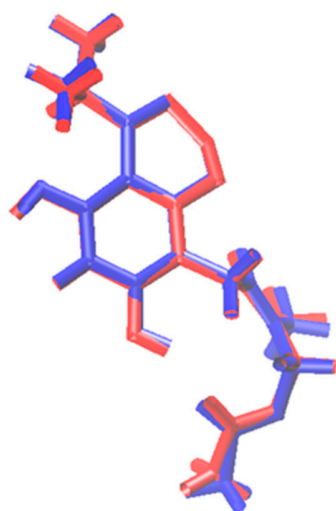

**RMSD: 0.19 Å**  
**G1/WG1E**

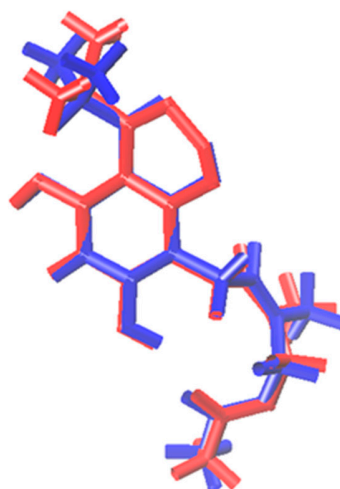

**RMSD: 0.48 Å**  
**G1/CG1E**

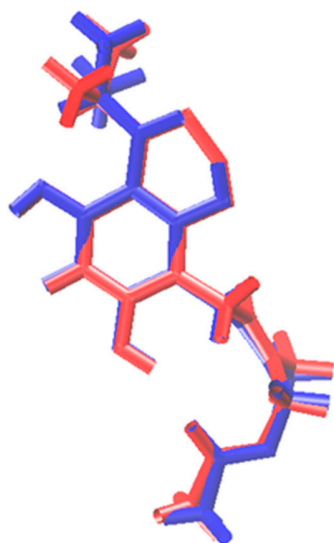

**RMSD: 0.55 Å**  
**G1/AG1E**

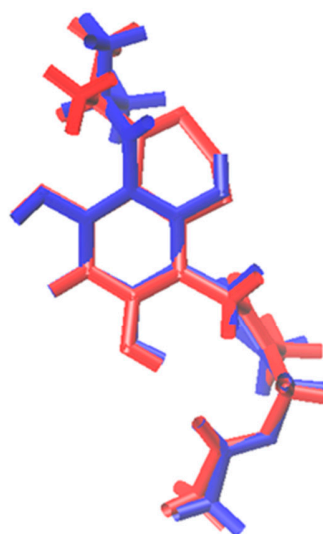

**RMSD: 0.79 Å**  
**G1/DG1E**

**Figure S3.** Comparison of the optimized structures of the most stable conformer in gas phase (**G1**) (in red color) surrounded of explicit solvent, in water (**WG1E**), in chloroform (**CG1E**), in acetonitrile (**AcG1E**), and in DMSO (**DG1E**) (in blue color).

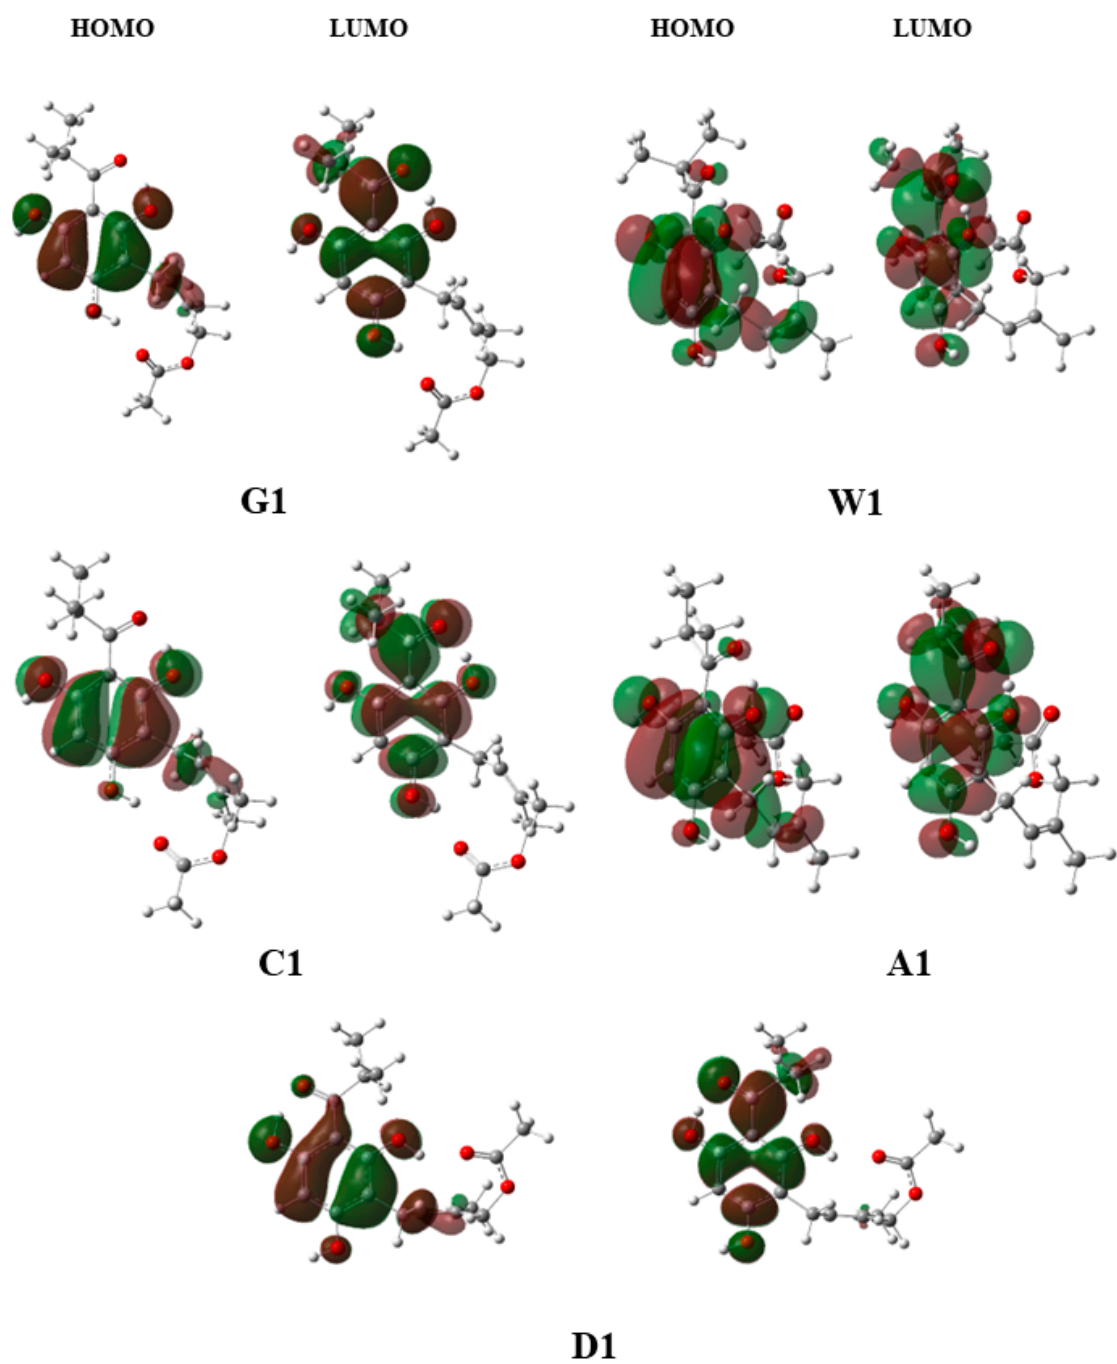

**Figure S4.** Isosurfaces of the frontier molecular orbitals HOMO and LUMO of the most stable caespitate conformers calculated at the APFD/6-311+G(2d,p) level of theory in gas and solution phases. In gas (**G1**), water (**W1**), chloroform (**C1**), acetonitrile (**A1**), and DMSO (**D1**) phases.

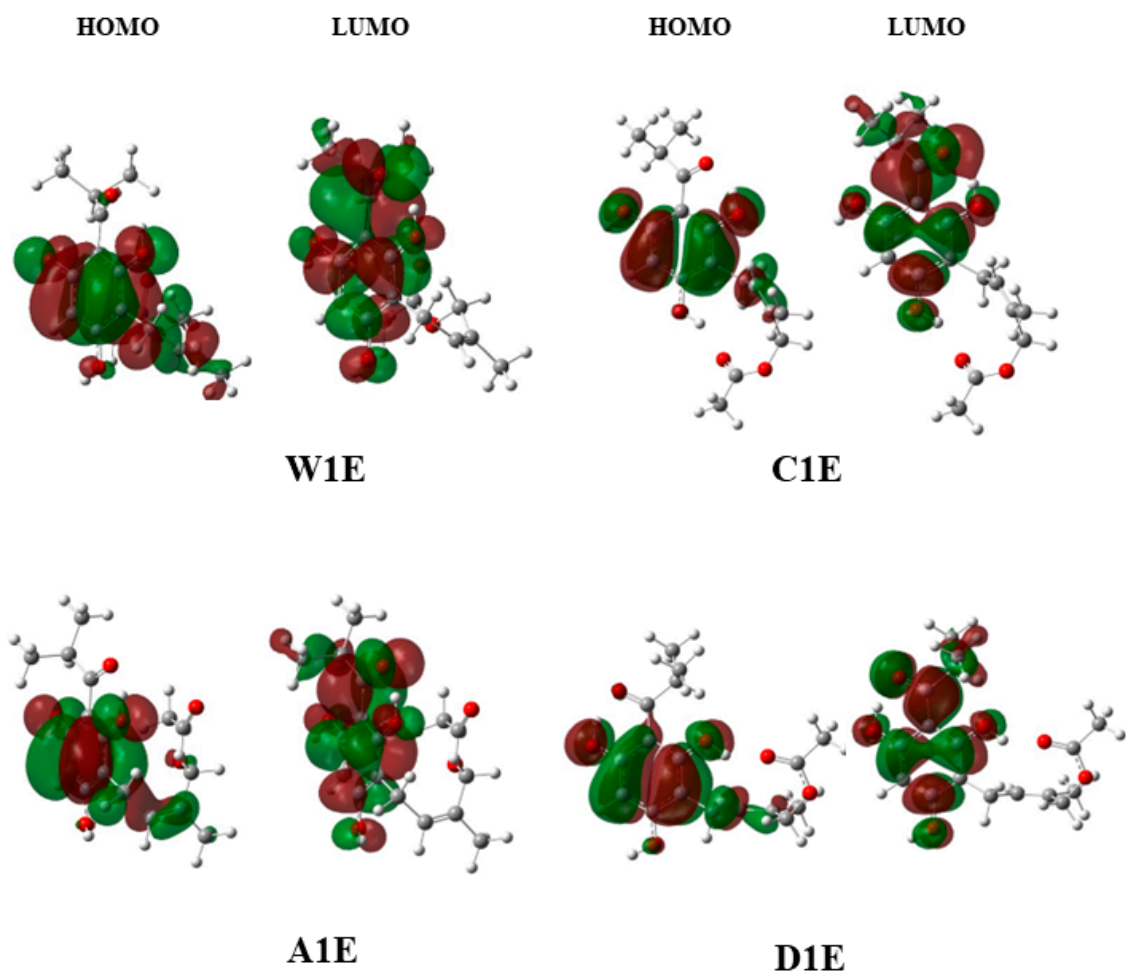

**Figure S5.** Isosurfaces of the frontier molecular orbitals HOMO and LUMO of the caespitate conformers calculated at the ONIOM ( $\omega$ B97X-D3/Def2-TZVP:XTB2) method with explicit solvent obtained from the most stable conformers in implicit solution in water (**W1E**), in chloroform (**C1E**), in acetonitrile (**A1E**), and DMSO (**D1E**).

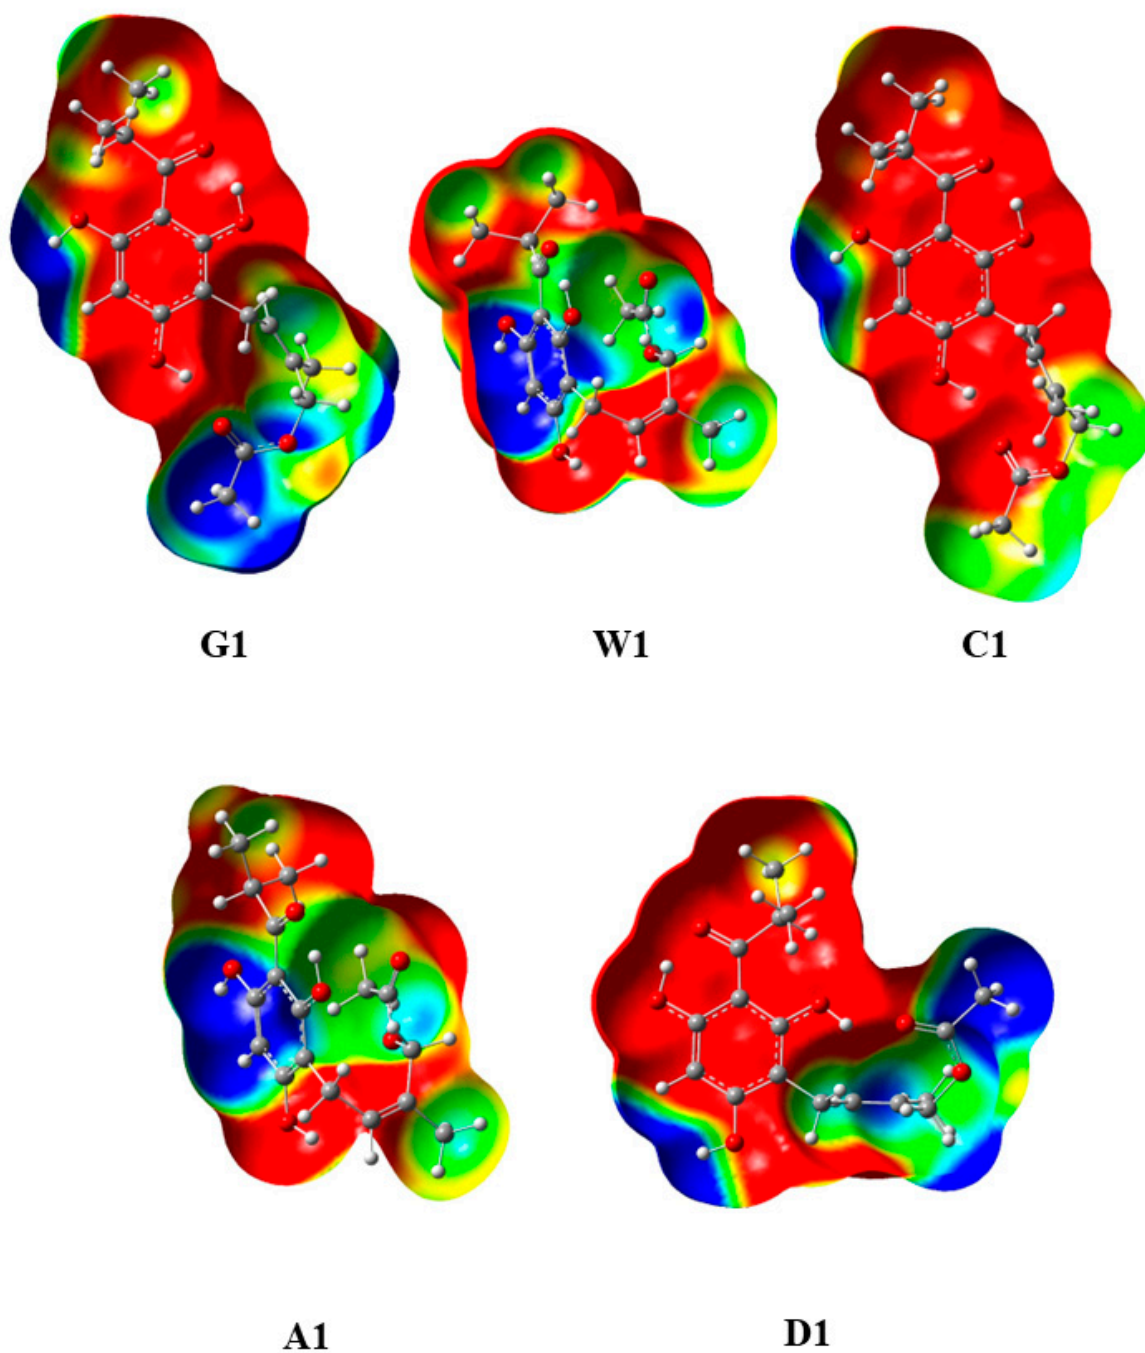

**Figure S6.** Molecular Electrostatic Potential (MEP) of the most stable caespitate conformers calculated at the APFD/6-311+G(2d,p) level of theory in gas and solution phases. In gas (G1), water (W1), chloroform (C1), acetonitrile (A1), and DMSO (D1) phases.



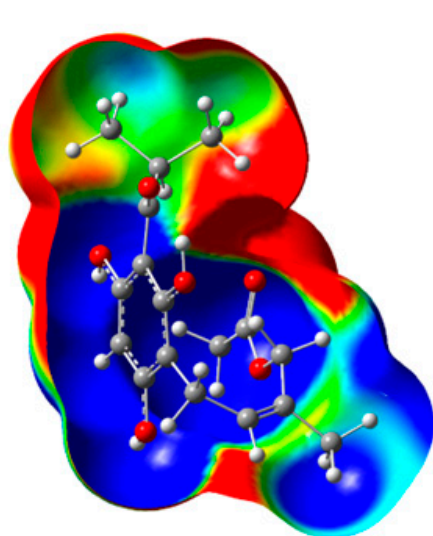

**W1E**

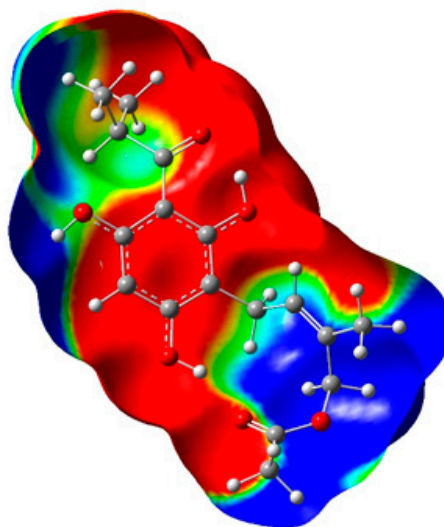

**C1E**

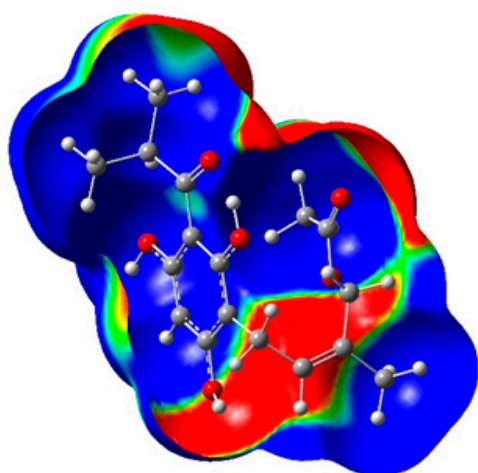

**A1E**

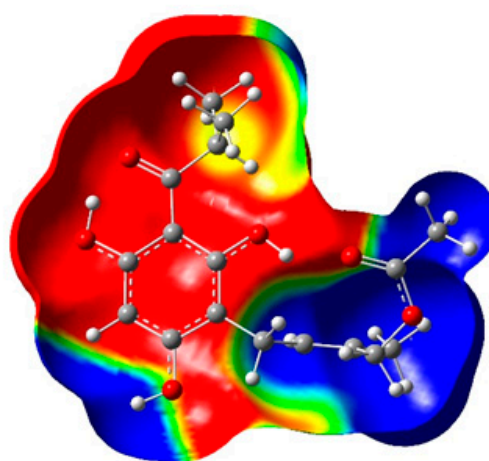

**D1E**

**Figure S7.** Molecular Electrostatic Potential (MEP) of the caespitate conformers calculated at the ONIOM ( $\omega$ B97X-D3/Def2-TZVP:XTB2) method with explicit solvent obtained from the most stable conformers in implicit solution in water (**W1E**), in chloroform (**C1E**), in acetonitrile (**A1E**), and DMSO (**D1E**).
